# Supplementary material for: Multifunctional strain-activated liquid–metal composite films with electromechanical decoupling for stretchable electromagnetic shielding
Source: Royal Society of Chemistry journal article supplement (doi:10.1039/d4mh00774c), 2024-01-01
Supplement: d4mh00774c1.pdf [file d4mh00774c1.pdf]

## Supplemental Information

### Multifunctional Strain-activated Liquid-metal Composite Film with Electromechanical Decoupling for Stretchable Electromagnetic Shielding

Jiali Chen,<sup>a,b</sup> Xuezhe Chen,<sup>a,b</sup> Yaozhuo Su,<sup>a,b</sup> Bin Shen,<sup>a,b\*</sup> and Wenge Zheng<sup>a,b</sup>

<sup>a</sup>Ningbo Key Lab of Polymer Materials, Ningbo Institute of Materials Technology and Engineering, Chinese Academy of Sciences, Ningbo, Zhejiang province, 315201, China

<sup>b</sup>University of Chinese Academy of Sciences, Beijing 100049, China

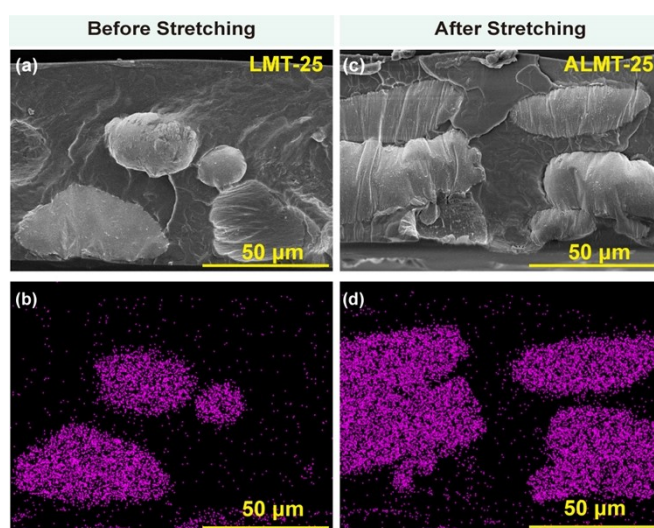

**Figure S1.** SEM images of LMT-25 (a, b) and ALMT-25 (c,d) with corresponding EDS elemental mapping results for Ga.

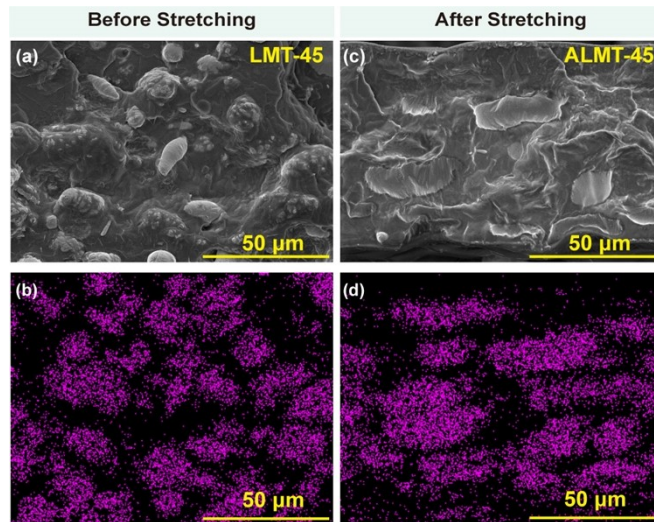

**Figure S2.** SEM images of LMT-45 (a, b) and ALMT-45 (c,d) with corresponding EDS elemental mapping results for Ga.

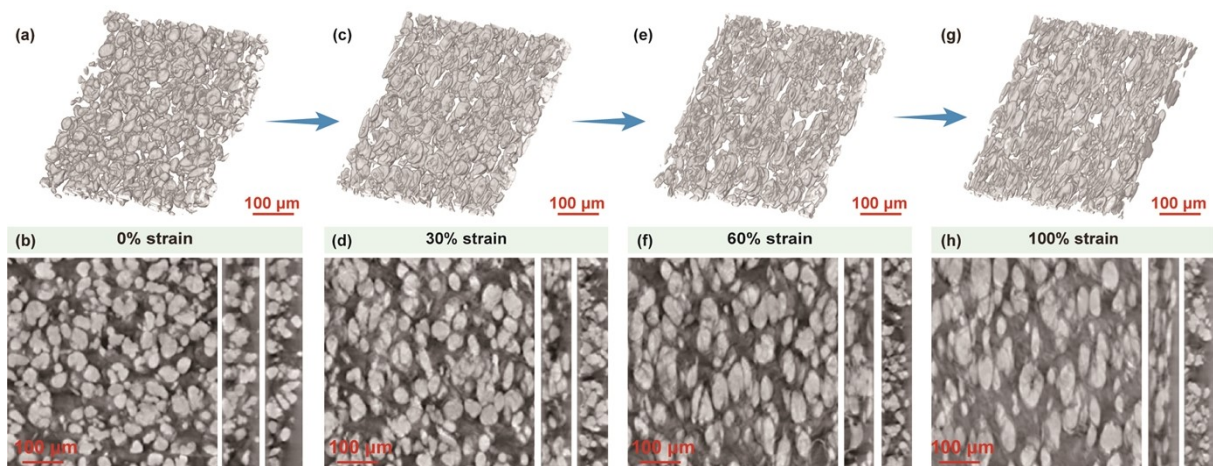

**Figure S3.** Micro-CT image of LMT-35 during stretching.

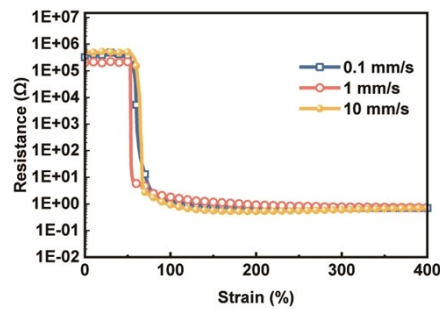

**Figure S4.** Resistance versus strain of LMT-35 (rate = 0.1, 1, and 10 mm/s).

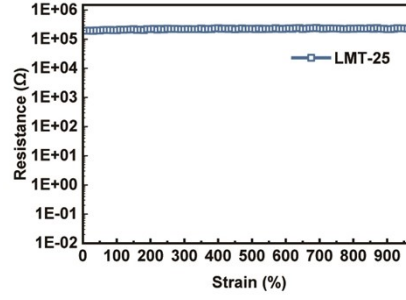

**Figure S5.** Resistance versus strain of LMT-25 (rate = 0.1 mm/s).

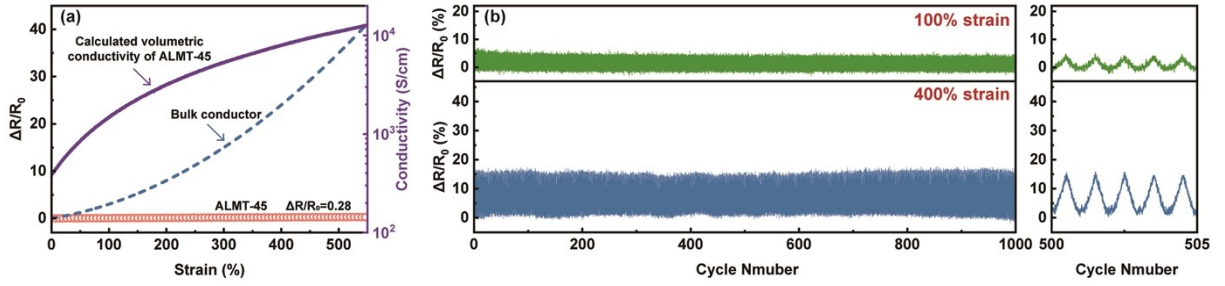

**Figure S6.** (a) Relative change in resistance and corresponding volumetric conductivity of ALMT-45 under strains of up to 550%, and theoretical relative change in resistance of the bulk conductor. (b) Relative change in resistance of ALMT-45 over 1000 cycles to 100% and 400% strain. (c) Relative change in resistance of ALMT-45 over 500 cycles to 100% and 400% strain.

Assume that the resistance, thickness, widths, length, volume, electrical resistivity, and conductivity of the sample at time  $t$  is  $R_t$ ,  $T_t$ ,  $W_t$ ,  $L_t$ ,  $V_t = W_t T_t L_t$ ,  $\rho_t$ , and  $\sigma_t$ , respectively.

At  $t = 0$ ,

$$R_0 = \frac{\rho_0 L_0}{S_0} = \frac{\rho_0 L_0}{W_0 T_0} = \rho_0 \frac{L_0^2}{V_0} = \frac{1}{\sigma_0} \frac{L_0^2}{V_0}$$

At  $t = t$ ,

$$\varepsilon_t = \frac{L_t - L_0}{L_0}$$

$$R_t = \frac{\rho_t L_t}{W_t T_t} = \rho_t \frac{L_t^2}{V_t} = \frac{1}{\sigma_t} \frac{L_t^2}{V_t} = \frac{1}{\sigma_t} \frac{(1 + \varepsilon_t)^2 L_0^2}{V_t}$$

$$\frac{R_t}{R_0} = \frac{\sigma_0 V_0}{\sigma_t V_t} (1 + \varepsilon_t)^2$$

The volume of the sample is assumed to be constant during stretching ( $V_0 = V_t$ ),

$$\frac{R_t}{R_0} = \frac{\sigma_0}{\sigma_t} (1 + \varepsilon_t)^2$$

(a) If the conductivity of the sample remains constant during stretching ( $\sigma_0 = \sigma_t$ ),

$$\frac{R_t}{R_0} = (1 + \varepsilon_t)^2$$

(b) If conductivity changes with strain,

$$\sigma_t = \frac{\sigma_0 (1 + \varepsilon_t)^2 R_0}{R_t}$$

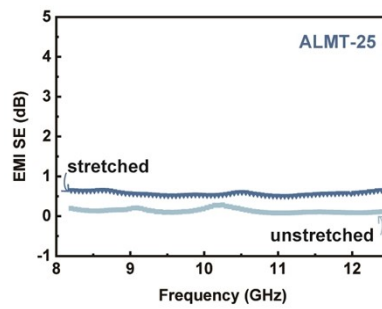

**Figure S7.** The EMI SE curves of ALMT-25.

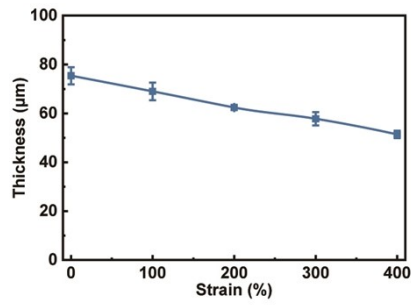

**Figure S8.** Thickness variation of ALMT-35 under different strains.

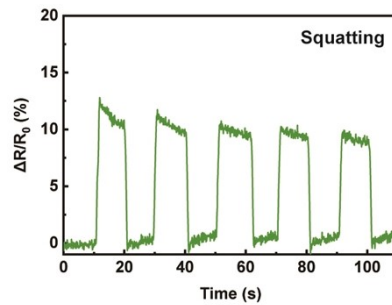

**Figure S9.** Relative resistance change of the ALMT sensor at the knee joint during squatting.**Table S1.** Comparisons of stretchable conductors reported in recent literature.

| Type                 | Filler                   | Matrix                                       | $\epsilon_{\max}$ | $\sigma_0$ (S/cm) | $\Delta R_t/R_0$ at max strain         | $\sigma_t$ (S/cm)        | QF                                      | Ref.             |
|----------------------|--------------------------|----------------------------------------------|-------------------|-------------------|----------------------------------------|--------------------------|-----------------------------------------|------------------|
| Liquid metal fillers | EGaInSn (35 vol%)        | TPU                                          | 700%              | 266               | 0.57@700%                              | 14000@700%               | 12@700%                                 | <b>This work</b> |
|                      | EGaInSn (45 vol%)        | TPU                                          | 550%              | 378               | 0.28@550%                              | 12700@550%               | 20@550%                                 |                  |
|                      | EGaInSn and Fe particles | Ecoflex                                      | 600%              | /                 | /                                      | 25000@400%               | /                                       | 1                |
|                      | 3D EGaIn network         | Ecoflex                                      | 510%              | 5300              | /                                      | 11000@510%               | /                                       | 2                |
|                      | EGaIn                    | SBS                                          | 1800%             | 100               | 0.04@1800%                             | /                        | 2-441@1800%                             | 3                |
|                      | EGaIn                    | VHB                                          | ~1200%            | 20600             | ~3.5 @1200%                            | /                        | ~3.4@1200%                              | 4                |
|                      | EGaIn + Ag               | SIS                                          | ~1200%            | 8210              | 40~70 @1200%                           | /                        | 0.3~3@1200%                             | 5                |
|                      | EGaIn                    | 11-PUA                                       | 744%              | 2500              | 0.85@700%                              | 20000@700%               | 8.2@700%                                | 6                |
|                      | EGaIn                    | TPU                                          | 1000%             | 4200              | 20@1000%                               | 11100@300%<br>3800@1000% | 0.5@1000%                               | 7                |
|                      | EGaIn                    | TPU                                          | 2260%             | 22532             | 0.34@1000%<br>1.59@1600%<br>31.6@2266% | /                        | 29.4@1000%<br>10.06@1600%<br>0.74@2266% | 8                |
|                      | EGaIn                    | TPU                                          | 4100              | 21000             | 19.8@4100%                             | /                        | 9.3@4100%                               | 9                |
|                      | EGaIn                    | PVDF                                         | 740%              | 435               | 4@740%                                 | /                        | 1.85@740%                               | 10               |
|                      | EGaIn + Ag               | EVA                                          | 1000%             | 8331              | 10@1000%                               | /                        | 1@1000%                                 | 11               |
|                      | EGaIn + Ag               | SIS                                          | 100%              | 6380              | 6.78@1000%                             | /                        | 1.47@1000%                              | 12               |
|                      | EGaIn + Ag               | PUA                                          | 2500%             | 6250              | 9@2500%                                | /                        | 2.78@2500%                              | 13               |
|                      | EGaIn + Ni               | P(AAm-co-MAAc)                               | 630%              | 2000              | 5.4@630%                               | /                        | 1.17@630%                               | 14               |
|                      | EGaIn                    | SEBS                                         | 900%              | 34000             | 39@700%                                | /                        | 0.2@700%                                | 15               |
| EGaIn                | PVP                      | 800%                                         | 6900              | 60@800%           | 100                                    | ~0.13@800%               | 16                                      |                  |
| EGaIn                | SIS                      | 2500%                                        | 30000             | 37@2500%          | /                                      | ~0.68@2500%              | 17                                      |                  |
| Rigid metal fillers  | AgNPs                    | SEBS                                         | 180%              | 11.4              | 1.05@180%                              | 84.6@180%                | 1.7@180%                                | 18               |
|                      | Ag flakes                | Fluorine rubber                              | 215%              | 738               | ~39.2@215%                             | ~180@215%                | ~0.055                                  | 19               |
| Rigid metal fillers  | Ag flakes                | Fluorine rubber<br>PAAm<br>alginate hydrogel | 400%              | 4000              | ~106 @ 400%                            | 950@400%                 | ~0.038                                  | 20               |
|                      | Ag flakes                | Fluorine rubber<br>PAAm<br>alginate hydrogel | 250%              | 374               | 70 @250%                               | /                        | ~0.036                                  | 21               |
|                      | Ag flakes                | Ecoflex                                      | 1780%             | ~133              | 153 @ 1780%                            | /                        | ~0.12                                   | 22               |
|                      | AuNPs                    | TPU                                          | 115%              | 11000             | ~20.2 @115%                            | 210@110%                 | ~0.057                                  | 23               |
|                      | AgNW                     | PNIPAM                                       | 800%              | 93                | 3@700%                                 | /                        | ~2.3@700%                               | 24               |
|                      | AgNW/Au                  | SBS                                          | 840%              | 30000             | ~2649 @840%                            | 3000@840%                | ~0.003                                  | 25               |
|                      | Cu                       | rubber                                       | 100%              | 215               | /                                      | 2@100%                   | /                                       | 26               |

| Type             | Filler   | Matrix          | $\epsilon_{max}$ | $\sigma_0$ (S/cm) | $\Delta R_t/R_0$ at max strain | $\sigma_t$ (S/cm) | QF          | Ref. |
|------------------|----------|-----------------|------------------|-------------------|--------------------------------|-------------------|-------------|------|
| Carbon materials | CNT+AgNW | PVDF            | 140%             | 5710              | ~1306 @140%                    | 20                | ~0.001@140% | 27   |
|                  | CNT      | Fluorine rubber | 118%             | 10                | ~3.75@118%                     | 10                | ~0.3@118%   | 28   |
|                  | CNT      | Fluorine rubber | 134%             | 57                | ~51@134%                       | 6                 | ~0.026@134% | 29   |
|                  | CNT      | PDMS            | 150%             | 1100              | 4@150%                         | /                 | 0.375@150%  | 30   |
|                  | CNT      | PU              | 300%             | 0.05-1            | 3.2@300%                       | /                 | 0.9@300%    | 31   |

SBS: poly(styrene-block-butadiene-block-styrene)

VHB: 3M VHB tape

SIS: Styrene-isoprene block copolymers

11-PUA: 11-(phosphonoundecyl)acrylate

PVDF: polyvinylidene difluoride

EVA: Ethylene-Vinyl Acetate

PUA: polyurethane acrylate

P(AAm-co-MAAc): Poly(acrylamide-co-methacrylic acid)

SEBS: poly[styrene-*b*-(ethylene-co-butylene)-*b*-styrene]

PVP: Polyvinyl pyrrolidone

PAAm: polyacrylamide

PAM: Polyacrylamide

PNIPAM: poly(N-isopropyl acrylamide)

PU: polyurethane

**Table S2.** Comparisons of stretchable EMI shielding materials reported in recent literature.

| Type                 | Filler                   | Matrix          | Strain (%) | Thickness (mm) | SE (dB)   | SSE (dB/mm) | Ref.             |
|----------------------|--------------------------|-----------------|------------|----------------|-----------|-------------|------------------|
| Liquid metal fillers | EgInSn (35 vol%)         | TPU             | 0-400%     | 0.075-0.051    | 58.1-63.8 | 774-1241    | <b>This work</b> |
|                      | EgInSn (45 vol%)         | TPU             | /          | 0.094          | 80.9      | 860.6       |                  |
|                      | EGaInSn and Fe particles | Ecoflex         | 0-400%     | 0.8-0.2        | 20.6-80.7 | 25.8-404    | 1                |
|                      | 3D EBiInSn network       | Ecoflex         | 0-400%     | 2-3.6          | 57.0-85.0 | 15.8-42.5   | 32               |
| Liquid metal fillers | 3D EGaIn network         | Ecoflex         | 0-400%     | 2-1            | 41.5-81.6 | 20.8-81.6   | 2                |
|                      | EGaIn                    | PDMS            | 0-50%      | 2.4            | 50.0-43.5 | 20.8-18.1   | 33               |
|                      | EGaIn                    | PDMS            | 0-100%     | 3              | ~37.0     | 12.3        | 34               |
|                      | EGaInSn                  | PDMS            | 0-75%      | 0.15-0.11      | 43.2-44.2 | 288-401     | 35               |
|                      | EGaInSn                  | PDMS/Textile    | 0-50%      | 0.35           | 72.6-52.4 | 149.7-207.4 | 36               |
|                      | EGaIn and CNT            | PAM and gelatin | 0-200%     | 1-0.22         | 17.7-37.4 | 17.7-170.0  | 37               |
|                      | ESnBi                    | PVDF            | /          | 2              | 68.8      | 34.4        | 38               |
| EGaIn                | CNF                      | /               | 0.1        | 40.5           | 405.0     | 39          |                  |
| EGaIn                | EM                       | /               | 1          | 90.6           | 90.6      | 40          |                  |

| Type                | Filler           | Matrix | Strain (%) | Thickness (mm) | SE (dB)   | SSE (dB /mm) | Ref. |
|---------------------|------------------|--------|------------|----------------|-----------|--------------|------|
|                     | EGaIn and Ag NPs | SEBS   | 300%       | 0.2            | 73.5      | 367.5        | 41   |
|                     | EGaIn foam       | /      | /          | 5              | 65.0      | 13.0         | 42   |
| Rigid metal fillers | AgNPs            | SEBS   | 0-100%     | 2.84           | 28.0-55.0 | 19.4-9.9     | 18   |
|                     | AgNWs            | PU     | 0-30%      | 0.6            | 63.9-56.2 | 106.5-93.7   | 43   |
|                     | Cu               | rubber | 0-75%      | 0.4            | 35.7-10.7 | 89-26.7      | 26   |
| Carbon materials    | CNT              | PU     | 0-30%      | 2.9            | 36.4-20.2 | 12.6-7.0     | 44   |
|                     | CNT              | TPU    | 0-200%     | 2-1.56         | 34.6-12.8 | 17.3-8.2     | 45   |
|                     | rGO              | PDMS   | 0-100%     | 2.4            | 25.0-18.0 | 10.5-7.5     | 46   |
|                     | MXene            | PU     | 0-30%      | 0.2            | 22.0      | 105.0        | 47   |
|                     | MXene            | TPU    | 0-70%      | 0.3            | 31.4-22.0 | 104.7-73.3   | 48   |

PDMS: Polydimethylsiloxane

CNF: Cellulose nanofibers

EM: expandable microsphere

## Reference

- 1 R. Zhu, Z. Li, G. Deng, Y. Yu, J. Shui, R. Yu, C. Pan and X. Liu, *Nano Energy*, 2022, **92**, 106700.
- 2 B. Yao, W. Hong, T. Chen, Z. Han, X. Xu, R. Hu, J. Hao, C. Li, H. Li, S. E. Perini, M. T. Lanagan, S. Zhang, Q. Wang and H. Wang, *Adv. Mater.*, 2020, **32**, 1907499.
- 3 Z. Ma, Q. Huang, Q. Xu, Q. Zhuang, X. Zhao, Y. Yang, H. Qiu, Z. Yang, C. Wang, Y. Chai and Z. Zheng, *Nat. Mater.*, 2021, **20**, 859–868.
- 4 S. Liu, D. S. Shah and R. Kramer-Bottiglio, *Nat. Mater.*, 2021, **20**, 851–858.
- 5 P. A. Lopes, B. C. Santos, A. T. de Almeida and M. Tavakoli, *Nat. Commun.*, 2021, **12**, 1–10.
- 6 C. J. Thrasher, Z. J. Farrell, N. J. Morris, C. L. Willey and C. E. Tabor, *Adv. Mater.*, 2019, **31**, 1903864.
- 7 L. Tang, L. Mou, W. Zhang and X. Jiang, *ACS Appl. Mater. Interfaces*, 2019, **11**, 7138–7147.
- 8 S. Chen, S. Fan, J. Qi, Z. Xiong, Z. Qiao, Z. Wu, J. C. Yeo and C. T. Lim, *Adv. Mater.*, 2023, **35**, 2208569.

- 9 W. Lee, H. Kim, I. Kang, H. Park, J. Jung, H. Lee, H. Park, J. S. Park, J. M. Yuk, S. Ryu, J. W. Jeong and J. Kang, *Science*, 2022, **378**, 637–641.
- 10 L. Zheng, M. Zhu, B. Wu, Z. Li, S. Sun and P. Wu, *Sci. Adv.*, 2021, **7**, 4041–4069.
- 11 J. Wang, G. Cai, S. Li, D. Gao, J. Xiong, P. See Lee, J. X. Wang, G. F. Cai, S. H. Li, D. C. Gao, J. Q. Xiong and P. S. Lee, *Adv. Mater.*, 2018, **30**, 1706157.
- 12 W. Zu, Y. Ohm, M. R. Carneiro, M. Vinciguerra, M. Tavakoli and C. Majidi, *Adv. Mater. Technol.*, 2022, **7**, 2200534.
- 13 K. Parida, G. Thangavel, G. Cai, X. Zhou, S. Park, J. Xiong and P. S. Lee, *Nat. Commun.*, 2019, **10**, 2158.
- 14 X. Peng Hao, C. Yu Li, C. Wei Zhang, M. Du, Z. Ying, Q. Zheng, Z. Liang Wu, X. P. Hao, C. Y. Li, C. W. Zhang, M. Du, Q. Zheng, Z. L. Wu and Z. Ying, *Adv. Funct. Mater.*, 2021, **31**, 2105481.
- 15 S. Zhu, J. H. So, R. Mays, S. Desai, W. R. Barnes, B. Pourdeyhimi and M. D. Dickey, *Adv. Funct. Mater.*, 2013, **23**, 2308–2314.
- 16 L. Tang, L. Mou, J. Shang, J. Dou, W. Zhang and X. Jiang, *Mater. Horizons*, 2020, **7**, 1186–1194.
- 17 D. Wu, S. Wu, P. Narongdej, S. Duan, C. Chen, Y. Yan, Z. Liu, W. Hong, I. Frenkel and X. He, *Adv. Mater.*, 2024, 2307632.
- 18 Z. Liu, F. Wan, L. Mou, M. Jung de Andrade, D. Qian, R. Wang, S. Yin, K. Li, H. Chen, B. An, Z. Hu, H. Wang, M. Zhu, S. Fang and Z. Liu, *Adv. Electron. Mater.*, 2019, **5**, 1800817.
- 19 N. Matsuhisa, M. Kaltenbrunner, T. Yokota, H. Jinno, K. Kuribara, T. Sekitani and T. Someya, *Nat. Commun.*, 2015, **6**, 7461.
- 20 N. Matsuhisa, D. Inoue, P. Zalar, H. Jin, Y. Matsuba, A. Itoh, T. Yokota, D. Hashizume and T. Someya, *Nat. Mater.*, 2017, **16**, 834–840.
- 21 Y. Ohm, C. Pan, M. J. Ford, X. Huang, J. Liao and C. Majidi, *Nat. Electron.*, 2021, **4**, 185–192.



- 22 S. H. Kim, S. Jung, I. S. Yoon, C. Lee, Y. Oh and J. M. Hong, *Adv. Mater.*, 2018, **30**, 1800109.
- 23 Y. Kim, J. Zhu, B. Yeom, M. Di Prima, X. Su, J. G. Kim, S. J. Yoo, C. Uher and N. A. Kotov, *Nature*, 2013, **500**, 59–63.
- 24 P. Song, H. Qin, H.-L. Gao, H.-P. Cong and S.-H. Yu, *Nat. Commun.*, 2018, **9**, 2786.
- 25 S. Choi, S. I. Han, D. Jung, H. J. Hwang, C. Lim, S. Bae, O. K. Park, C. M. Tschabrunn, M. Lee, S. Y. Bae, J. W. Yu, J. H. Ryu, S.-W. Lee, K. Park, P. M. Kang, W. B. Lee, R. Nezafat, T. Hyeon and D.-H. Kim, *Nat. Nanotechnol.*, 2018, **13**, 1048–1056.
- 26 C. Liu, J. Cai, P. Dang, X. Li and D. Zhang, *ACS Appl. Mater. Interfaces*, 2020, **12**, 12101–12108.
- 27 K.-Y. Chun, Y. Oh, J. Rho, J.-H. Ahn, Y.-J. Kim, H. R. Choi and S. Baik, *Nat. Nanotechnol.*, 2010, **5**, 853–857.
- 28 T. Sekitani, H. Nakajima, H. Maeda, T. Fukushima, T. Aida, K. Hata and T. Someya, *Nat. Mater.*, 2009, **8**, 494–499.
- 29 T. Sekitani, Y. Noguchi, K. Hata, T. Fukushima, T. Aida and T. Someya, *Science*, 2008, **321**, 1468–1472.
- 30 D. J. Lipomi, M. Vosgueritchian, B. C. K. Tee, S. L. Hellstrom, J. A. Lee, C. H. Fox and Z. Bao, *Nat. Nanotechnol.*, 2011, **6**, 788–792.
- 31 M. K. Shin, J. Oh, M. Lima, M. E. Kozlov, S. J. Kim and R. H. Baughman, *Adv. Mater.*, 2010, **22**, 2663–2667.
- 32 D. Yu, Y. Liao, Y. Song, S. Wang, H. Wan, Y. Zeng, T. Yin, W. Yang and Z. He, *Adv. Sci.*, 2020, **7**, 2000177.
- 33 Z. Wang, J. Ren, R. Liu, X. Sun, D. Huang, W. Xu, J. Jiang, K. Ma and Y. Liu, *Compos. Part A Appl. Sci. Manuf.*, 2020, **136**, 105957.
- 34 Z. Wang, X. Xia, M. Zhu, X. Zhang, R. Liu, J. Ren, J. Yang, M. Li, J. Jiang and Y. Liu, *Adv. Funct. Mater.*, 2022, **32**, 2108336.
- 35 G. Wang, J. Chen, W. Zheng and B. Shen, *Chem. Eng. J.*, 2024, **488**, 151052.

- 36 L.-C. Jia, X.-X. Jia, W.-J. Sun, Y.-P. Zhang, L. Xu, D.-X. Yan, H.-J. Su and Z.-M. Li, *ACS Appl. Mater. Interfaces*, 2020, **12**, 53230–53238.
- 37 H. Guo, Y. Shi, F. Pan, S. Zheng, X. Chai, Y. Yang, H. Jiang, X. Wang, L. Li, Z. Xiu, J. Wang and W. Lu, *Nano Energy*, 2023, **114**, 108678.
- 38 P. Zhang, X. Ding, Y. Wang, M. Shu, Y. Gong, K. Zheng, X. Tian and X. Zhang, *ACS Appl. Polym. Mater.*, 2019, **1**, 2006–2014.
- 39 S. Y. Liao, X. Y. Wang, X. M. Li, Y. J. Wan, T. Zhao, Y. G. Hu, P. L. Zhu, R. Sun and C. P. Wong, *Chem. Eng. J.*, 2021, **422**, 129962.
- 40 Y. Xu, Z. Lin, K. Rajavel, T. Zhao, P. Zhu, Y. Hu, R. Sun and C. P. Wong, *Nano-Micro Lett.*, 2022, **14**, 1–15.
- 41 J. Dong, X. Tang, Y. Peng, C. Fan, L. Li, C. Zhang, F. Lai, G. He, P. Ma, Z. Wang, Q. Wei, X. P. Yan, H. L. Qian, Y. Huang and T. Liu, *Nano Energy*, 2023, **108**, 108194.
- 42 J. Gao, J. Ye, S. Chen, J. Gong, Q. Wang and J. Liu, *ACS Appl. Mater. Interfaces*, 2021, **13**, 17093–17103.
- 43 L. Jia, K. Ding, R. Ma, H. Wang, W. Sun, D. Yan, B. Li and Z. Li, *Adv. Mater. Technol.*, 2019, **4**, 1800503.
- 44 K. Huang, M. Chen, G. He, X. Hu, W. He, X. Zhou, Y. Huang and Z. Liu, *Carbon*, 2020, **157**, 466–477.
- 45 D. Feng, D. Xu, Q. Wang and P. Liu, *J. Mater. Chem. C*, 2019, **7**, 7938–7946.
- 46 Z. Wang, W. Yang, R. Liu, X. Zhang, H. Nie and Y. Liu, *Compos. Sci. Technol.*, 2021, **206**, 108652.
- 47 W. Yuan, J. Yang, F. Yin, Y. Li and Y. Yuan, *Compos. Commun.*, 2020, **19**, 90–98.
- 48 J. Dong, S. Luo, S. Ning, G. Yang, D. Pan, Y. Ji, Y. Feng, F. Su and C. Liu, *ACS Appl. Mater. Interfaces*, 2021, **13**, 60478–60488.
